**TITLE:** TWO-DIMENSIONAL ECHOCARDIOGRAPHIC DETERMINATION OF RIGHT VENTRICULAR MAXIMUM MINOR AXIS DIMENSION FRACTIONAL SHORTENING (MMD<sub>R</sub>)

**AUTHORS:** M.A. Durkin MB, F.C. Anaes., T. Rafferty M.D.

**AFFILIATION:** Anaes. Dept., Yale University School of Medicine, Yale New-Haven Hospital, New Haven, CT 06510

The right ventricular (RV) long axis (base to apex) encompasses major and minor axes. The maximum minor axis dimension fractional shortening (MMD<sub>R</sub>) has been proposed, on the basis of logic, as a potentially useful contractility index.<sup>1</sup> MMD<sub>R</sub> measurements have never been reported. This study addresses that issue.

**Methods.** Twenty adult cardiac surgery patients fulfilling Human Investigation Committee criteria were studied. Long axis (LA) 2-D echo images (transesophageal 5.0 MHz phased-array transducer) at the level of the anterior mitral leaflet were analyzed in terms of diastolic and systolic MMD (Fig 1) and LA planed area. Determinations were expressed as ratios. Measurements were obtained following induction/intubation, sternotomy, and pericardectomy when the latter was present.

Observer variabilities were calculated as estimate 1 minus estimate 2 divided by mean estimate 1 + 2 and expressed as percent. Estimate 2 viewing order was by random number table. Relationships were evaluated by regression analysis, variance ratio test and Bland-Altman technique. (Fig. 2)

**Results.** MMD<sub>R</sub> measurements ( $0.32 \pm 0.11$ ) were obtainable in 20/20 cases. Intra/Interobserver variabilities were 8 and 10 percent, respectively. The MMD<sub>R</sub>/LA area<sub>R</sub> relationship was significant ( $n=57; r=0.64$ ). The hypothesis that respective variances were not significantly different was not

rejected ( $F=1.13; P>0.05$ ). Differences did not vary systematically over the measurement range (Fig 2). **Comment.** Image quality permitted measurement in all cases. Determinations were reproducible and comparable in accuracy/inaccuracy to a standard 2-D echo index. MMD<sub>R</sub> measurement offers a perspective which may be particularly useful in defining RV regional wall motion abnormalities.

#### Reference

1. Feigenbaum H: Echocardiography. Philadelphia, PA, Lea and Febiger, 1986, 158-167.

Fig 1.

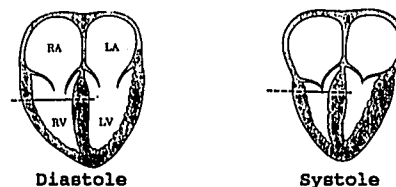

Fig 2.

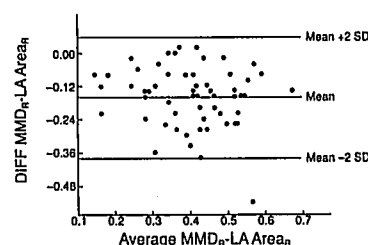

## A543

**TITLE:** FEASIBILITY OF TELEMETRIC PULSE OXIMETRY MONITORING ON A POSTPARTUM WARD

**AUTHORS:** P.H. Pan, MD, and C.F. James, MD

**AFFILIATION:** Dept. of Anesth., Univ. of Fla. College of Med., Gainesville, FL 32610-0254

Telemetric pulse oximetry networks (TPONs) can identify low O<sub>2</sub> saturation (SpO<sub>2</sub>) and thus prevent undetected hypoxia. To assess the feasibility of ward TPON, we developed a computer algorithm to detect the number of episodes and their duration of artifacts, disconnections, and alarms.

The study was approved by the institutional review board and informed consent was obtained from 36 postcesarean section patients. A TPON (Nellcor Oximet) with 8 remote oximeters and a central display station was used to monitor SpO<sub>2</sub> for 24 h after arrival of patients on the ward. SpO<sub>2</sub>, heart rate, and plethysmographic waveforms were collected via the TPON every 10 s. SpO<sub>2</sub> data were categorized as valid or false alarm (nonphysiologic effects of artifacts); probe disconnection or oximeter off; and SpO<sub>2</sub> < 94% and < 92%. Also, nurses charted the women's activities and problems. Data from the TPON and nursing charts were analyzed and categorized by a signal-processing algorithm to determine the number and duration of episodes of each type of data.

Eighty-seven percent of TPON data were valid and 11.4% indicated probe disconnection or oximeter off (table). False alarms accounted for only 1.4% of the data but occurred frequently ( $32 \pm 25$  episodes/24 h).

By incorporating into the alarm a waiting period equal to the mean duration of a false alarm (0.6 min), the number of false alarms can be reduced by 50%. Alternatively, by lowering the SpO<sub>2</sub> alarm limit from 94% to 92%, the number of alarms can be reduced almost fivefold. Our data provide a logical basis for setting alarm limit defaults for TPON and can be incorporated into an algorithm for discounting false alarms.

TABLE. Type of Data Recorded by a Telemetric Pulse Oximetry Network from 36 Women after Cesarean Section

|                                     |        |            | False |                      |      |
|-------------------------------------|--------|------------|-------|----------------------|------|
|                                     | Valid  | Disconnect | Alarm | SpO <sub>2</sub> (%) |      |
|                                     | Data   | Data       | Data  | < 94                 | < 92 |
| Cumulative Monitoring Time (min)    |        |            |       |                      |      |
| Average                             | 1215.3 | 159.1      | 20.5  | 104.5                | 12.3 |
| SD                                  | 228.9  | 191.1      | 19.4  | 165.1                | 33.4 |
| Episodes/24 H (n)                   |        |            |       |                      |      |
| Average                             | --     | 7.4        | 32.5  | 67.2                 | 14.9 |
| SD                                  | --     | 5.9        | 25.2  | 79.5                 | 31.0 |
| Duration of Each Episode (mean min) |        |            |       |                      |      |
| Average                             | 76.4   | 26.8       | 0.6   | 1.1                  | 0.5  |
| SD                                  | 82.6   | 32.8       | 0.1   | 1.0                  | 0.4  |

SpO<sub>2</sub>: O<sub>2</sub> saturation detected by pulse oximetry.
